# Supplementary material for: Resource Utilization in the First 2 Years Following Operative Correction for Tetralogy of Fallot: Study Using Data From the Optum's De‐Identified Clinformatics Data Mart Insurance Claims Database
Source: PubMed Central journal article supplement — J Am Heart Assoc. 2020 Jul 21;9(15):e016581. doi: 10.1161/JAHA.120.016581 (PMC7792257; doi:10.1161/jaha.120.016581), 2020-07-21
Supplement: JAH3-9-e016581-s001.pdf [file JAH3-9-e016581-s001.pdf]

# **SUPPLEMENTAL MATERIAL**

**Table S1. Characteristics of survivors after operative correction of tetralogy of Fallot with and without 2 years of continuous insurance claims data.**

|                                                                          | Continuous enrollment<br>(n=269) | <2 years of continuous<br>enrollment<br>(n=212) | <i>p</i> |
|--------------------------------------------------------------------------|----------------------------------|-------------------------------------------------|----------|
| <b>Male sex</b>                                                          | 53% (143)                        | 54% (114)                                       | 0.89     |
| <b>White race (vs. other races)</b>                                      | 65% (176)                        | 64% (136)                                       | 0.99     |
| <b>Age at operative correction (years)</b>                               |                                  |                                                 | 0.68     |
| 0                                                                        | 49% (133)                        | 53% (113)                                       |          |
| 1                                                                        | 45% (121)                        | 42% (82)                                        |          |
| 2                                                                        | 6% (15)                          | 5% (10)                                         |          |
| <b>Census regions</b>                                                    |                                  |                                                 | 0.95     |
| Midwest                                                                  | 25% (68)                         | 27% (58)                                        |          |
| Northeast                                                                | 10% (28)                         | 9% (20)                                         |          |
| South                                                                    | 49% (131)                        | 48% (101)                                       |          |
| West                                                                     | 16% (42)                         | 33% (16)                                        |          |
| <b>Highest parental education level</b>                                  |                                  |                                                 | 0.73     |
| <12 <sup>th</sup> grade                                                  | 1% (3)                           | 1% (2)                                          |          |
| High school diploma                                                      | 18% (48)                         | 16% (33)                                        |          |
| Bachelor's degree                                                        | 46% (125)                        | 49% (104)                                       |          |
| Graduate degree                                                          | 33% (89)                         | 29% (62)                                        |          |
| Unknown/missing                                                          | 1% (4)                           | 5% (11)                                         |          |
| <b>Family annual income</b>                                              |                                  |                                                 | 0.75     |
| <\$40K                                                                   | 6% (15)                          | 7% (14)                                         |          |
| \$40-49,000                                                              | 5% (13)                          | 5% (11)                                         |          |
| \$50-59,000                                                              | 5% (13)                          | 5% (10)                                         |          |
| \$60-74,000                                                              | 6% (16)                          | 8% (16)                                         |          |
| \$75-99,000                                                              | 13% (35)                         | 11% (24)                                        |          |
| >\$100,000                                                               | 42% (112)                        | 33% (71)                                        |          |
| Unknown/missing                                                          | 24% (65)                         | 31% (66)                                        |          |
| <b>Insurance type</b>                                                    |                                  |                                                 | 0.90     |
| Point of service                                                         | 70% (187)                        | 70% (148)                                       |          |
| Exclusive provider organization                                          | 13% (36)                         | 13% (28)                                        |          |
| Health maintenance organization                                          | 12% (33)                         | 14% (29)                                        |          |
| Preferred provider organization                                          | 4% (12)                          | 3% (6)                                          |          |
| Other                                                                    | 0.4% (1)                         | 0.5% (1)                                        |          |
| <b>Length of stay of hospitalization for operative correction (days)</b> | 7 (IQR: 5,11)                    | 7 (IQR: 5,11)                                   | 0.76     |

**Table S2. Observed differences in resource utilization between census regions.**

|                                                  | <b>Northeast<br/>(N=28)</b> | <b>Midwest<br/>(N=68)</b> | <b>South<br/>(N=131)</b> | <b>West<br/>(N=42)</b> | <b>p</b> |
|--------------------------------------------------|-----------------------------|---------------------------|--------------------------|------------------------|----------|
| <b>Hospitalizations for operative correction</b> |                             |                           |                          |                        |          |
| Total length of stay                             | 6 (4, 9)                    | 7 (5, 11)                 | 7 (4, 11)                | 7 (6,12)               | 0.20     |
| Cost (\$)                                        | 52407 (38480, 73204)        | 58362 (43672, 75724)      | 58362 (38480, 91498)     | 58362 (52407, 95651)   | 0.16     |
| <b>Subsequent hospitalizations</b>               |                             |                           |                          |                        |          |
| Total length of stay                             | 2.5 (1, 11)                 | 4 (2.5, 9)                | 8 (3,18)                 | 4 (2, 11)              | 0.046    |
| Cost (\$)                                        | 16,598 (4612, 55654)        | 19790 (9177, 34312)       | 36892 (16431, 126160)    | 34877 (7849, 75892)    | 0.14     |
| <b>Total outpatient visits</b>                   |                             |                           |                          |                        |          |
| N                                                | 24.5 (15, 35)               | 18.5 (13, 26)             | 21 (13, 34)              | 18 (14, 25)            | 0.16     |
| Cost (\$)                                        | 6943 (4587, 11286)          | 4492 (2635, 7023)         | 5315 (3618, 8029)        | 4970 (3454,8198))      | 0.01     |
| <b>Cardiac outpatient visits</b>                 |                             |                           |                          |                        |          |
| N                                                | 7 (5-8)                     | 5 (3, 8)                  | 6 (4, 8)                 | 6 (4,8)                | 0.05     |
| Cost (\$)                                        | 420 (196, 588)              | 340 (136, 605)            | 309 (153, 603)           | 309(153, 603)          | 0.64     |
| <b>Noncardiac outpatient Visits</b>              |                             |                           |                          |                        |          |
| N                                                | 14.5 (8.5-28.5)             | 13 (7.5, 22)              | 15 (7, 24)               | 12 (7, 20)             | 0.28     |
| Cost (\$)                                        | 6676 (4384, 10654)          | 3936 (2329, 6338)         | 4913 (3178, 7321)        | 4783 (2999, 7674)      | 0.005    |
| <b>Emergency department visits</b>               |                             |                           |                          |                        |          |
| N                                                | 1 (0,3)                     | 2 (1,3)                   | 1 (0,2)                  | 0 (0,1)                | 0.0003   |
| Cost (\$)                                        | 1029 (656, 3289)            | 1158 (496, 2031)          | 1540 (577, 3667)         | 991 (400, 3573)        | 0.28     |

N (IQR)
